# Supplementary material for: Large-area and efficient perovskite light-emitting diodes via low-temperature blade-coating
Source: PubMed Central journal article supplement (PMC7794572; doi:10.1038/s41467-020-20433-4), 2021-01-08
Supplement: 41467_2020_20433_MOESM3_ESM.pdf [file 41467_2020_20433_MOESM3_ESM.pdf]

## **Description of Additional Supplementary Files**

File Name: Supplementary Movie 1

Description: Video of the film formation process for 0.8 M without FPMAI.

File Name: Supplementary Movie 2

Description: Video of the film formation process for 0.2 M without FPMAI.

File Name: Supplementary Movie 3

Description: Video of the film formation process for 0.8 M with FPMAI.

File Name: Supplementary Movie 4

Description: Video of the film formation process for 0.2 M with FPMAI.
